# Supplementary material for: Changes of the retinal and choroidal vasculature in cerebral small vessel disease
Source: PubMed Central journal article supplement (PMC8901619; doi:10.1038/s41598-022-07638-x), 2022-03-07

# Changes of the retinal and choroidal vasculature in cerebral small vessel disease

## - Supplement -

Clara F. Geerling†, Jan H. Terheyden†, S. Magdalena Langner, Christine Kindler, Vera C. Keil, Christopher A. Turski, Gabrielle N. Turski, Maximilian W.M. Wintergerst, Gabor C. Petzold\*, Robert P. Finger\*

**Supplementary Table 1. Imaging parameters**

| <b>MRI</b> | <b>Sequence</b> | <b>Orientation</b> | <b>Slice thickness</b> | <b>Matrix</b> | <b>TR</b> | <b>TE</b> | <b>IT</b> |
|------------|-----------------|--------------------|------------------------|---------------|-----------|-----------|-----------|
| 3 Tesla    | 2D FLAIR        | axial              | 6mm; no gap            | 512×512       | 12 s      | 140 ms    | 2850 ms   |
| 1.5 Tesla  | 2D FLAIR        | axial              | 6mm; no gap            | 352×352       | 11 s      | 140 ms    | 2800 ms   |

Abbreviations: TE, echo time; IT, inversion time; TR, repetition time

**Supplementary Table 2. Results of receiver operating curve-analysis in the overall cohort**

| <b>Parameter</b>                  | <b>AUC</b> | <b>95%-Confidence interval</b> | <b>P-value</b> |
|-----------------------------------|------------|--------------------------------|----------------|
| WMI                               | 0.920      | [0.820;1.0]                    | *< 0.0001      |
| NOL                               | 0.858      | [0.713;1.0]                    | *0.002         |
| Choriocapillaris reflectivity, SD | 0.735      | [0.544;0.926]                  | *0.039         |

Abbreviations: CI, confidence interval; AUC, area under the receiver operating curve; NOL, number of white matter hyperintensity lesions on magnet resonance imaging; SD, Standard deviation

Supplementary Figure 1. Receiver operating characteristic curve for choriocapillaris reflectivity standard deviation, white matter lesion index and number of lesions

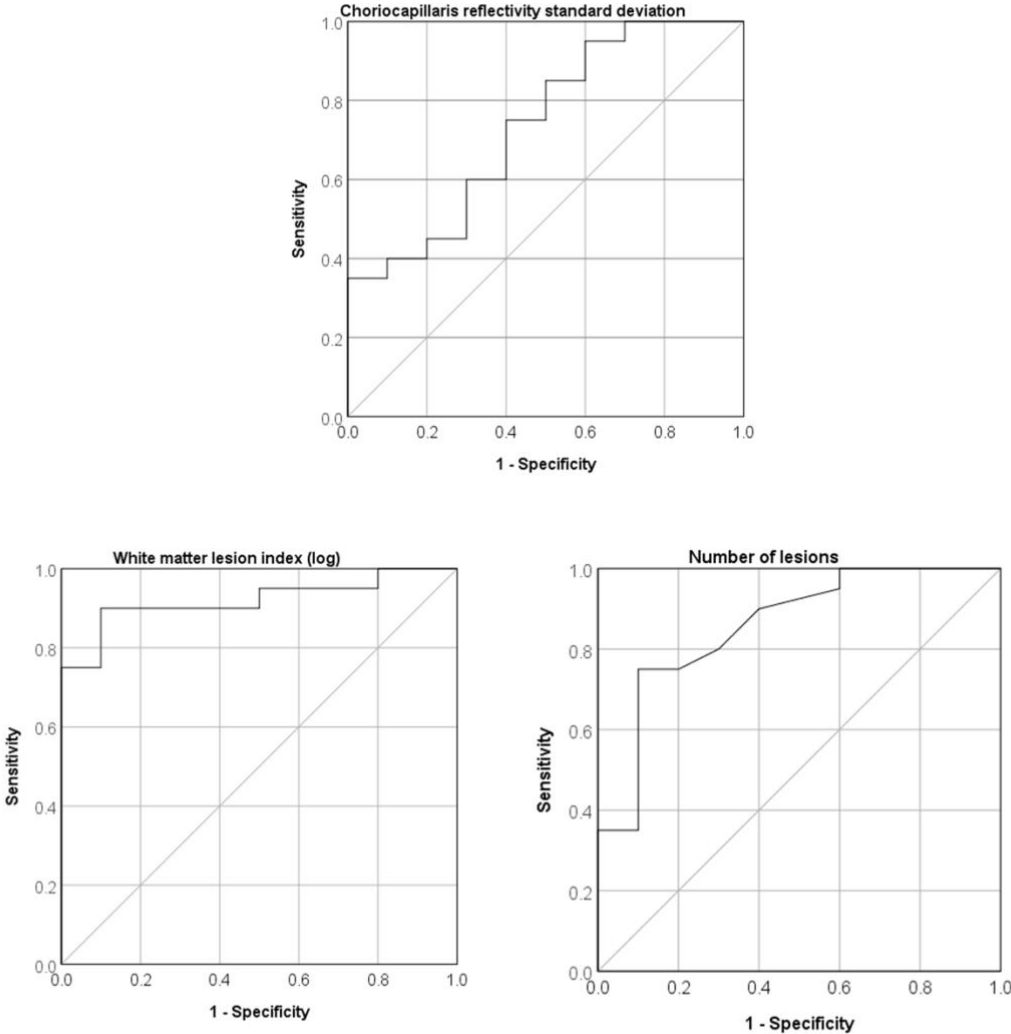

**Supplementary Figure 2. Graphical representation of associations between the investigated OCT-A and MRI parameters. Triangles refer to participants with CSVD and circles to control participants**

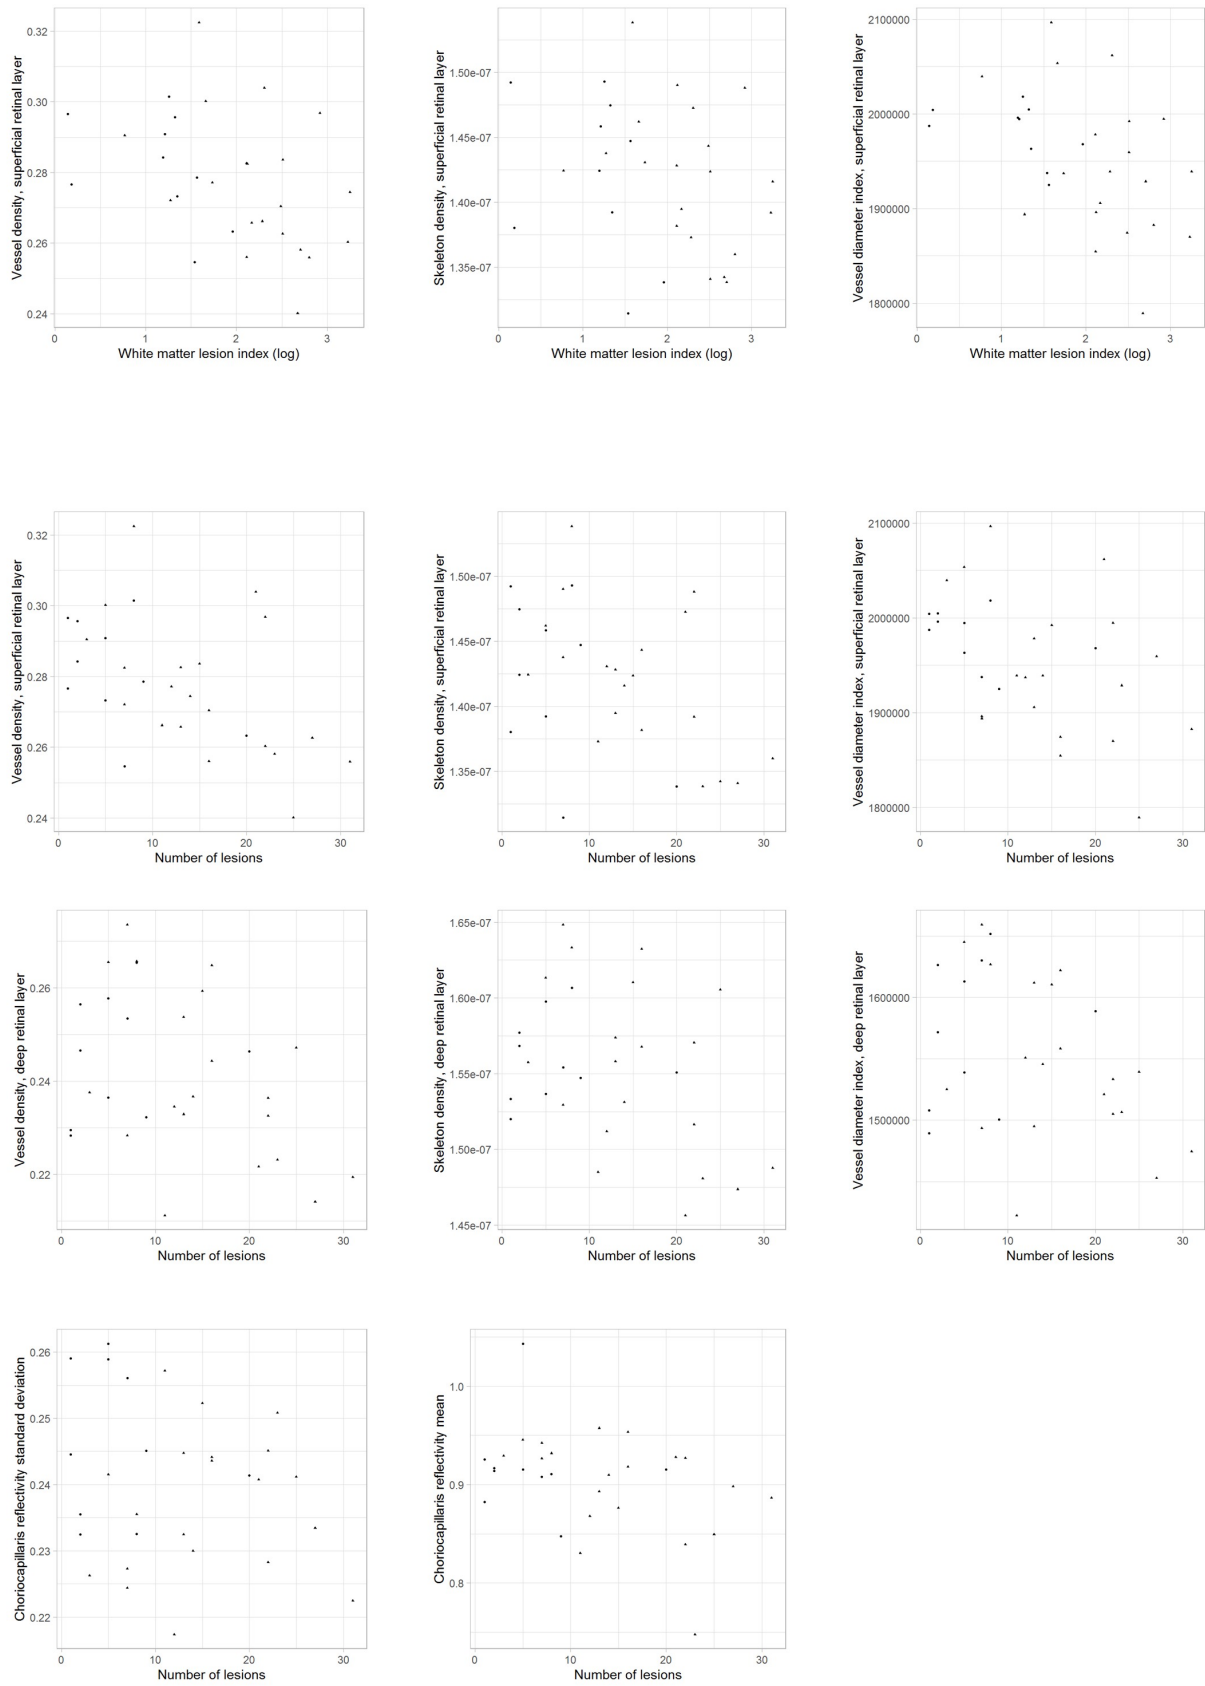

Supplement: 41598_2022_7638_MOESM1_ESM.pdf [file 41598_2022_7638_MOESM1_ESM.pdf]
